# Supplementary material for: Fast and Sensitive Determination of the Fungicide Carbendazim in Fruit Juices with an Immunosensor Based on White Light Reflectance Spectroscopy
Source: MDPI journal article supplement (doi:10.3390/bios11050153), 2021-05-13
Supplement: s1 [file s1]

## Supplementary Material

### a) TMB peroxidase substrate reaction

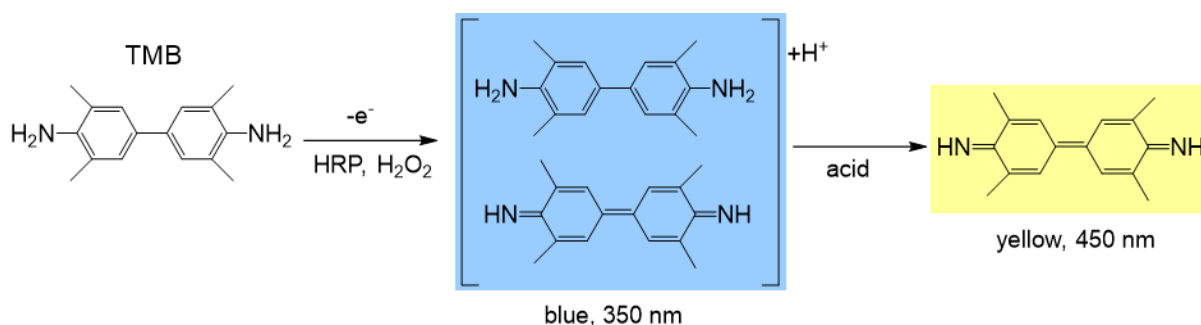

**Scheme S1.** TMB peroxidase substrate reaction.

### b) Optimization of the carbendazim ELISA

#### i) Selection of benzimidazole conjugate and anti-carbendazim antibody concentrations

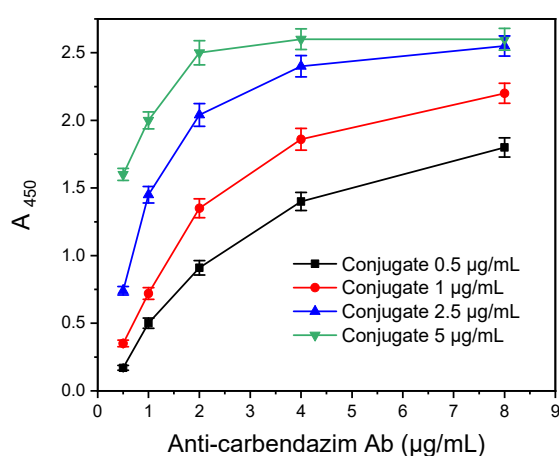

**(a)**

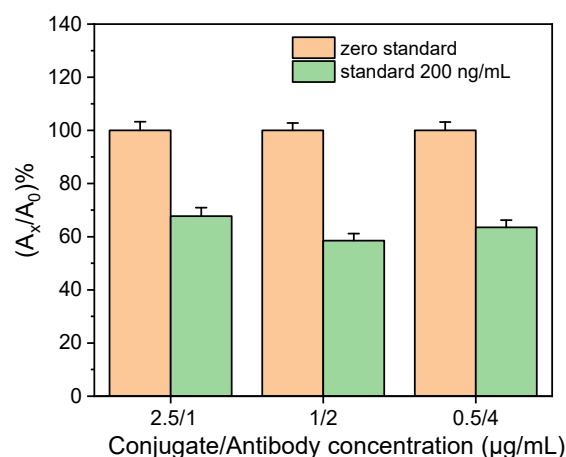

**(b)**

**Figure S1.** (a) Absorbance values at 450 nm received for zero carbendazim standard from wells coated with benzimidazole-conjugate concentration 0.5 (black squares), 1 (red circles), 2.5 (blue up triangles) or 5 μg/mL (green down triangles) when assayed with anti-carbendazim antibody concentrations ranging from 0.5 to 8 μg/mL. Each point is the mean value of four wells  $\pm$  SD. (b) Percent absorbance values obtained for the zero carbendazim standard (orange bars) and a standard containing 200 ng/mL carbendazim (green bars) using different combinations of benzimidazole conjugate for well coating and anti-carbendazim antibody. Each point is the mean value of four wells  $\pm$  SD.

## ii) Selection of assay buffer

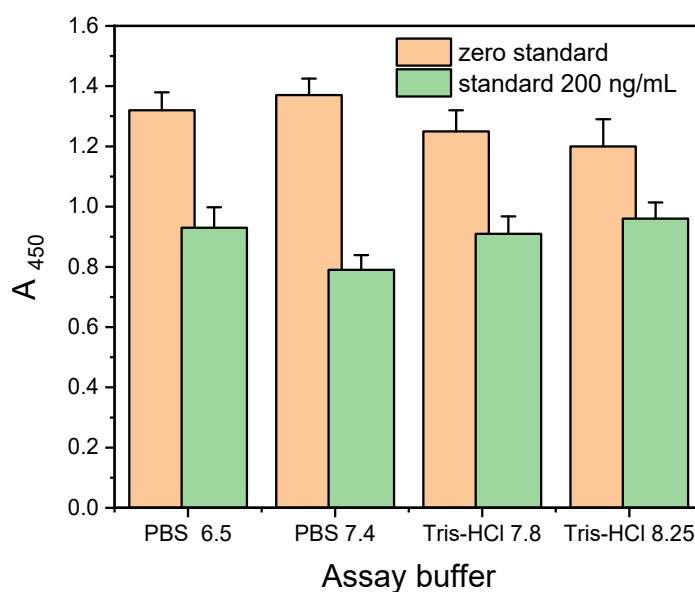

**Figure S2.** Absorbance values at 450 nm received for zero carbendazim standard (orange bars) and a standard containing 200 ng/mL carbendazim (green bars) using the following assay buffers: 10 mM PBS buffer, pH 6.5; 10 mM PBS, pH 7.4; 50 mM Tris-HCl buffer, pH 7.8; and 50 mM Tris-HCl buffer, pH 8.25. All buffers contained 0.4% BSA. Each point is the mean value of four wells  $\pm$  SD.

## iii) Effect of standard/antibody pre-incubation on the calibration curve

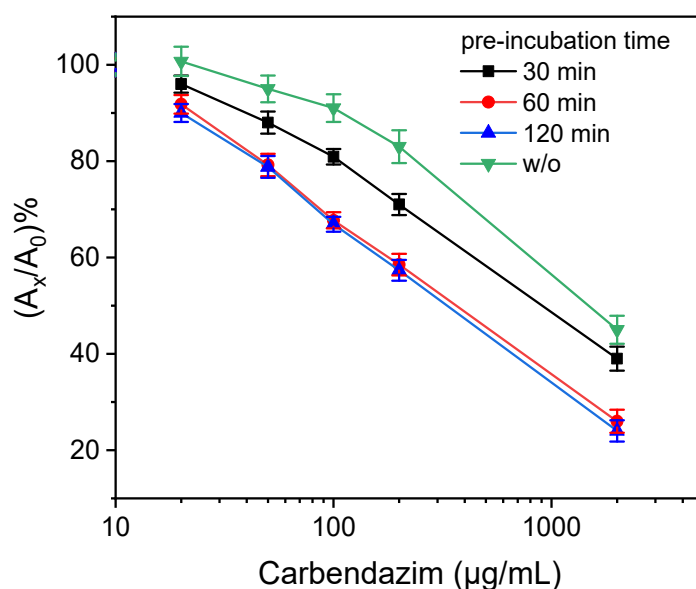

**Figure S3.** Carbendazim calibration plots obtained without pre-incubation of carbendazim standards with the anti-carbendazim antibody solution (green down triangles) or with pre-incubation for 30 min (black squares), 60 min (red circles), and 120 min (blue up triangles). Each point is the mean value of four wells  $\pm$  SD.

c) **Optimization of the carbendazim WRLS-biosensor assay**

i) **Selection of benzimidazole-conjugate concentration**

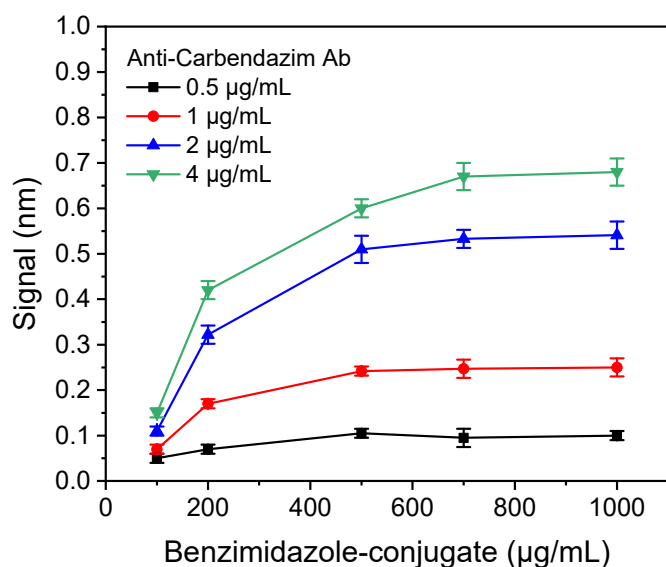

**Figure S4.** Signals received for zero carbendazim standard from WRLS chips coated with benzimidazole conjugate concentrations ranging from 100 to 1000  $\mu\text{g/mL}$  when assayed with anti-carbendazim antibody solutions of 0.5 (black squares), 1 (red circles), 2 (blue up triangles) or 4  $\mu\text{g/mL}$  (green down triangles). Each point is the mean value of measurements obtained by three chips  $\pm$  SD.

ii) **Selection of anti-carbendazim antibody concentration**

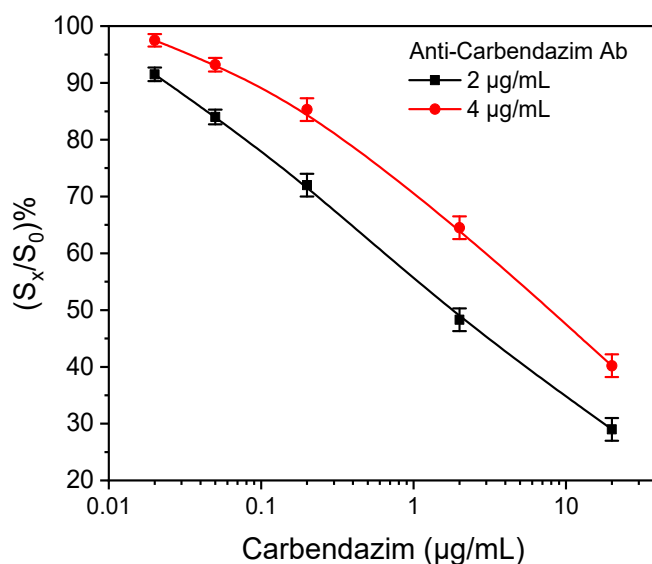

**Figure S5.** Calibration plots obtained from chips coated with 500  $\mu\text{g/mL}$  of benzimidazole conjugate and assayed with anti-carbendazim antibody solutions with concentration 2 (black squares) or 4  $\mu\text{g/mL}$  (red circles). Each point is the mean value of three measurements  $\pm$  SD.
